# Supplementary material
Source: Springer Nature journal article supplement (https://www.springermedizin.de/resource/supplementary/13012_2011_493_MOESM2_ESM.pdf/9630148)

### Discovery Model 2

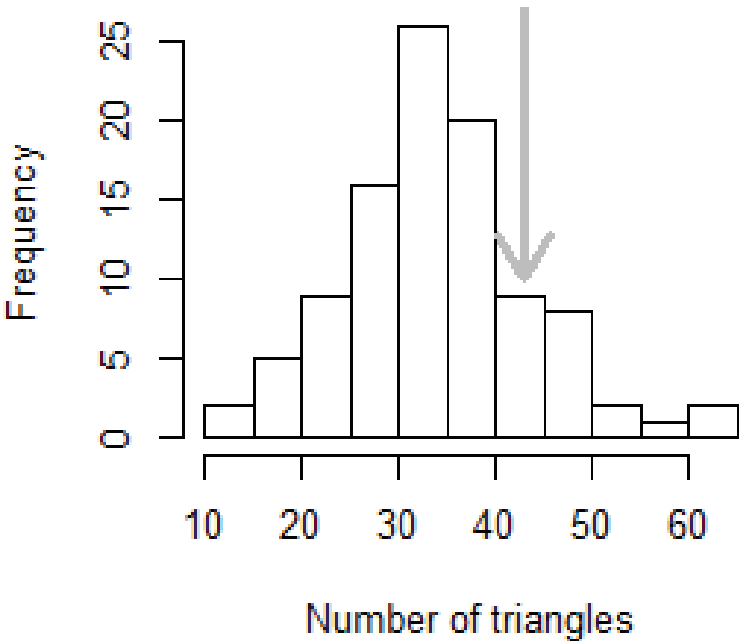

### Discovery Model 3

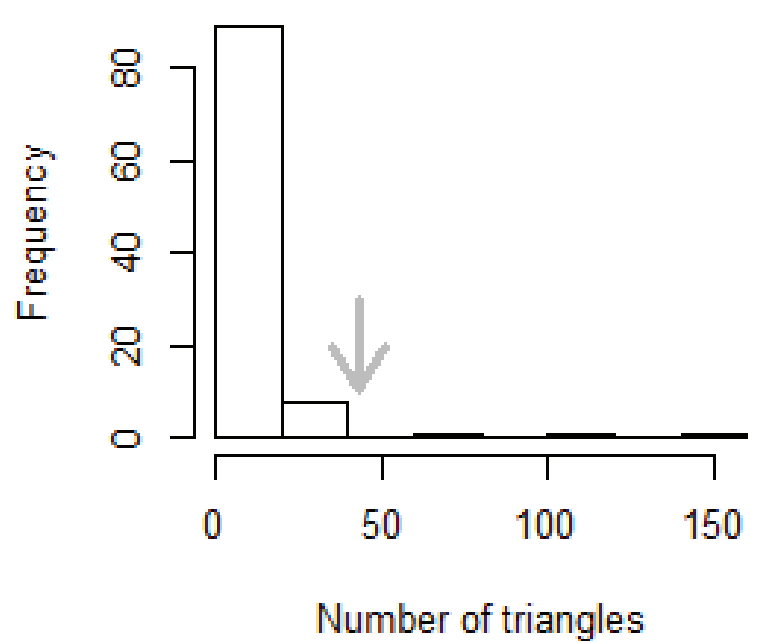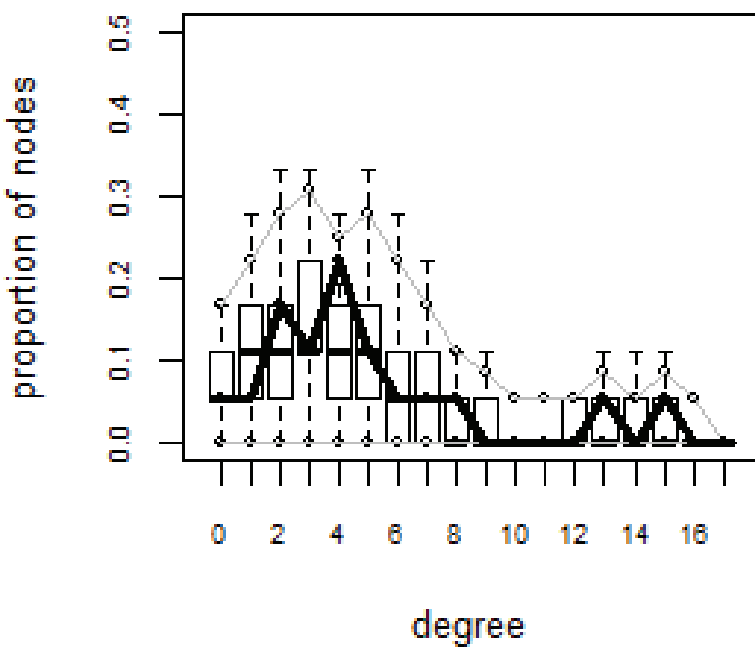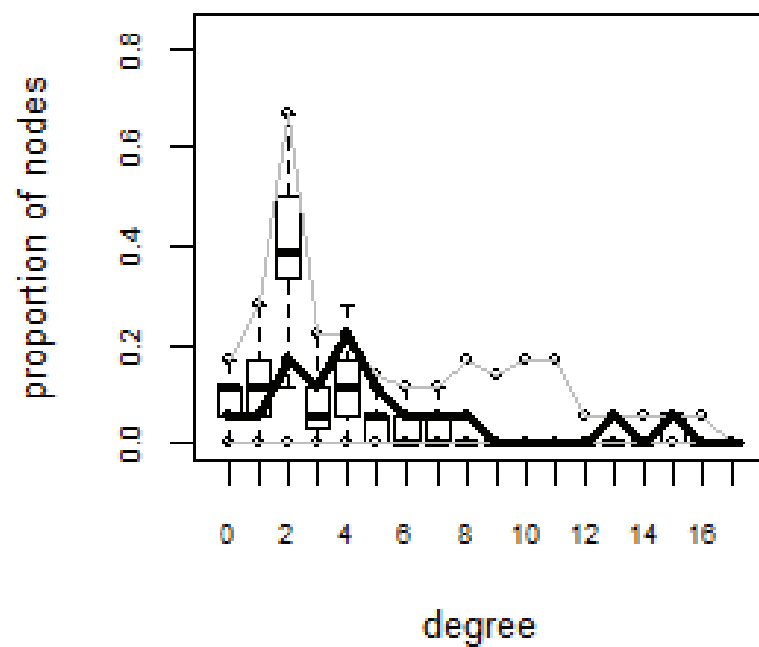

Supplement: MOESM2 [file 9630148]
